# Supplementary material
Source: PubMed Central journal article supplement (PMC5310127)
Supplement: mmc1.pdf [file mmc1.pdf]

# Risk Factors for In-Hospital Mortality in Smoke Inhalation-Associated Acute Lung Injury

Data From 68 United States Hospitals

*Sameer S. Kadri, MD; Andrew C. Miller, MD; Samuel Hohmann, PhD; Stephanie Bonne, MD; Carrie Nielsen, MA; Carmen Wells, RN; Courtney Gruver, RN; Sadeq A. Quraishi, MD; Junfeng Sun, PhD; Rongman Cai, PhD; Peter E. Morris, MD; Bradley D. Freeman, MD; James H. Holmes, MD; Bruce A. Cairns, MD; and Anthony F. Suffredini, MD; on behalf of US Critical Illness and Injury Trials Group: Smoke Inhalation-associated Acute Lung Injury (SI-ALI) Investigators (USCIIT-SI-ALI)*

CHEST 2016; 150(6):1260-1268

*Online supplements are not copyedited prior to posting and the author(s) take full responsibility for the accuracy of all data.*

**e-Table 1. Comparison of quarterly trends in respiratory system burn injury diagnosis codes<sup>a</sup> among in-patient discharges from 154 AMCs and affiliates (2008-2014)**

| Year and quarter | Respiratory system burn-injury discharges <sup>b</sup><br>N | dx 508.2 <sup>c</sup><br><i>Respiratory Conditions from smoke inhalation</i><br>N | dx 947.0<br><i>Burn of mouth and pharynx</i><br>N | dx 947.1<br><i>Burn of larynx, trachea and lung</i><br>N | dx 987.9<br><i>Toxic effect of unspecified gas, fume, or vapor</i><br>N | All discharges <sup>c</sup><br>N | Respiratory system burn-injury case-density <sup>d</sup> |
|------------------|-------------------------------------------------------------|-----------------------------------------------------------------------------------|---------------------------------------------------|----------------------------------------------------------|-------------------------------------------------------------------------|----------------------------------|----------------------------------------------------------|
| 2008q4           | 262                                                         | 0                                                                                 | 48                                                | 37                                                       | 183                                                                     | 932,412                          | 28.1                                                     |
| 2009q1           | 275                                                         | 0                                                                                 | 34                                                | 39                                                       | 209                                                                     | 931,194                          | 29.5                                                     |
| 2009q2           | 241                                                         | 0                                                                                 | 38                                                | 47                                                       | 170                                                                     | 952,038                          | 25.3                                                     |
| 2009q3           | 210                                                         | 0                                                                                 | 36                                                | 38                                                       | 151                                                                     | 964,230                          | 21.8                                                     |
| 2009q4           | 256                                                         | 0                                                                                 | 43                                                | 36                                                       | 189                                                                     | 948,562                          | 27.0                                                     |
| 2010q1           | 307                                                         | 0                                                                                 | 40                                                | 59                                                       | 229                                                                     | 937,115                          | 32.8                                                     |
| 2010q2           | 250                                                         | 0                                                                                 | 43                                                | 34                                                       | 190                                                                     | 960,265                          | 26.0                                                     |
| 2010q3           | 254                                                         | 0                                                                                 | 47                                                | 34                                                       | 186                                                                     | 972,855                          | 26.1                                                     |
| 2010q4           | 263                                                         | 0                                                                                 | 37                                                | 26                                                       | 209                                                                     | 963,998                          | 27.3                                                     |
| 2011q1           | 329                                                         | 0                                                                                 | 32                                                | 34                                                       | 273                                                                     | 956,716                          | 34.4                                                     |
| 2011q2           | 262                                                         | 0                                                                                 | 27                                                | 34                                                       | 209                                                                     | 969,519                          | 27.0                                                     |
| 2011q3           | 229                                                         | 0                                                                                 | 48                                                | 22                                                       | 166                                                                     | 979,395                          | 23.4                                                     |
| 2011q4           | 397                                                         | 322                                                                               | 36                                                | 28                                                       | 31                                                                      | 960,995                          | 41.3                                                     |
| 2012q1           | 480                                                         | 407                                                                               | 33                                                | 43                                                       | 29                                                                      | 981,914                          | 48.9                                                     |
| 2012q2           | 356                                                         | 301                                                                               | 32                                                | 27                                                       | 16                                                                      | 977,162                          | 36.4                                                     |
| 2012q3           | 327                                                         | 262                                                                               | 44                                                | 22                                                       | 14                                                                      | 991,015                          | 33.0                                                     |
| 2012q4           | 392                                                         | 308                                                                               | 39                                                | 45                                                       | 19                                                                      | 979,336                          | 40.0                                                     |
| 2013q1           | 450                                                         | 373                                                                               | 51                                                | 42                                                       | 14                                                                      | 964,806                          | 46.6                                                     |
| 2013q2           | 409                                                         | 328                                                                               | 53                                                | 34                                                       | 16                                                                      | 979,512                          | 41.8                                                     |
| 2013q3           | 325                                                         | 261                                                                               | 35                                                | 30                                                       | 14                                                                      | 989,228                          | 32.9                                                     |
| 2013q4           | 370                                                         | 306                                                                               | 38                                                | 30                                                       | 18                                                                      | 963,248                          | 38.4                                                     |
| 2014q1           | 476                                                         | 408                                                                               | 41                                                | 48                                                       | 19                                                                      | 940,162                          | 50.6                                                     |
| 2014q2           | 348                                                         | 290                                                                               | 32                                                | 31                                                       | 13                                                                      | 974,232                          | 35.7                                                     |
| 2014q3           | 312                                                         | 256                                                                               | 32                                                | 24                                                       | 9                                                                       | 996,846                          | 31.3                                                     |
| 2014q4           | 374                                                         | 327                                                                               | 28                                                | 31                                                       | 6                                                                       | 954,890                          | 39.2                                                     |

<sup>a</sup> International Classification of Diseases Version 9 (ICD-9) principal or secondary

<sup>b</sup> In-patient discharges from 154 AMCs and affiliates

<sup>c</sup> Introduced in September 2011

<sup>d</sup> Respiratory system burn-injury discharges\*100,000/all discharges

Data Source: University HealthSystem Consortium (Chicago, IL)

AMC=Academic medical center; dx= Diagnosis code (primary of secondary); ICD-9= International Classification of Diseases version 9; q1=Jan-Mar q2=Apr-Jun q3=Jul-Sep q4=Oct-Nov AMC=Academic medical center

**e-Table 2. Multivariate logistic regression identifying predictors of in-hospital mortality in SI-ALI subset with 0% body surface burns [N=200; Deaths=23 (11.5%)])**

| Variable                                                                                  | Odds Ratio | 95% Confidence Interval | p-value |
|-------------------------------------------------------------------------------------------|------------|-------------------------|---------|
| <b>Age [years; Ref: 18-40]</b>                                                            |            |                         |         |
| 41-50                                                                                     | 0.39       | 0.02-9.74               | 0.564   |
| 51-60                                                                                     | 0.45       | 0.02-12.06              | 0.632   |
| 61-70                                                                                     | 1.08       | 0.04-33.49              | 0.965   |
| >70                                                                                       | 7.10       | 0.38-134.30             | 0.191   |
| <b>Sex [Ref: Female]</b>                                                                  | 3.01       | 0.60-15.01              | 0.180   |
| <b>Patient Region [Ref: West]</b>                                                         |            |                         |         |
| Midwest                                                                                   | 0.22       | 0.03-1.72               | 0.149   |
| Northeast                                                                                 | 0.70       | 0.06-8.53               | 0.777   |
| South                                                                                     | 0.18       | 0.02-1.98               | 0.163   |
| <b>3M™ APR DRG Admission Risk-of-Mortality Assignment [Ref: Extreme]</b>                  |            |                         |         |
| Minor or Moderate                                                                         | 0.04       | 0.002-0.58              | 0.019   |
| Major                                                                                     | 0.01       | 0.001-0.23              | 0.003   |
| <b>Charlson Comorbidity Index [Ref: 0]</b>                                                |            |                         |         |
| 1-2                                                                                       | 0.45       | 0.08-2.66               | 0.379   |
| >2                                                                                        | 2.68       | 0.20-37.60              | 0.465   |
| <b>Initial<sup>a</sup> Vasopressor Use [Ref: None]</b>                                    | 28.64      | 4.44-184.82             | 0.0004  |
| <b>Initial<sup>a</sup> Empiric Systemic Antibacterial Therapy<sup>a</sup> [Ref: None]</b> | 0.70       | 0.12-4.13               | 0.689   |
| <b>Hospital Bed Capacity [Ref: ≥500 beds]</b>                                             |            |                         |         |
| <500 beds                                                                                 | 0.40       | 0.04-3.74               | 0.416   |
| <b>Burn Center Status [Ref: ABA Burn Center]</b>                                          |            |                         |         |
| Self-reported Burn Center                                                                 | 0.06       | 0.01-0.43               | 0.005   |
| Non Burn Center                                                                           | 0.51       | 0.05-5.33               | 0.570   |

<sup>a</sup> Within 2 days of hospitalization Data Source: University HealthSystem Consortium (Chicago, IL)  
 ABA= American Burn Association; APR DRG= All Patients Refined Diagnosis-Related-Groups; TBSA= Total Burn Surface Area

**e-Table 3. Multivariate logistic regression identifying predictors of in-hospital mortality in SI-ALI subset with  $\geq 20\%$  body surface burns [N=289; Deaths=144 (49%)]**

| Variable                                                                      | Odds Ratio | 95% Confidence Interval | p-value |
|-------------------------------------------------------------------------------|------------|-------------------------|---------|
| <b>Age [years; Ref: 18-40]</b>                                                |            |                         |         |
| 41-50                                                                         | 1.03       | 0.45-2.37               | 0.945   |
| 51-60                                                                         | 1.79       | 0.79-4.02               | 0.161   |
| 61-70                                                                         | 13.68      | 4.86-38.53              | <0.001  |
| >70                                                                           | 8.91       | 3.21-24.75              | <0.001  |
| <b>Sex [Ref: Female]</b>                                                      |            |                         |         |
|                                                                               | 0.75       | 0.40-1.41               | 0.373   |
| <b>Patient Region [Ref: West]</b>                                             |            |                         |         |
| Midwest                                                                       | 1.15       | 0.47-2.84               | 0.761   |
| Northeast                                                                     | 2.63       | 0.85-8.12               | 0.093   |
| South                                                                         | 1.34       | 0.56-3.23               | 0.511   |
| <b>3M™ APR DRG Admission Risk-of-Mortality Assignment [Ref: Extreme]</b>      |            |                         |         |
| Minor or Moderate                                                             | 0.13       | 0.04-0.47               | 0.002   |
| Major                                                                         | 0.34       | 0.18-0.65               | 0.001   |
| <b>Charlson Comorbidity Index [Ref: 0]</b>                                    |            |                         |         |
| 1-2                                                                           | 0.86       | 0.45-1.66               | 0.655   |
| >2                                                                            | 0.57       | 0.19-1.74               | 0.322   |
| <b>Initial<sup>a</sup> Vasopressor Use [Ref: None]</b>                        |            |                         |         |
|                                                                               | 3.07       | 1.64-5.77               | 0.001   |
| <b>Initial<sup>a</sup> Empiric Systemic Antibacterial Therapy [Ref: None]</b> |            |                         |         |
|                                                                               | 1.24       | 0.64-2.40               | 0.53    |
| <b>Hospital Bed Capacity [Ref: <math>\geq 500</math> beds]</b>                |            |                         |         |
| <500 beds                                                                     | 2.39       | 1.02-5.60               | 0.046   |
| <b>Burn Center Status [Ref: ABA Burn Center]</b>                              |            |                         |         |
| Self-reported Burn Center                                                     | 1.33       | 0.66-2.69               | 0.431   |
| Non Burn Center                                                               | 0.82       | 0.23-2.90               | 0.757   |

<sup>a</sup> Within 2 days of hospitalization; Data Source: University HealthSystem Consortium (Chicago, IL)  
 ABA= American Burn Association; APR DRG= All Patients Refined Diagnosis-Related-Groups

**e-Table 4. Multivariate logistic regression identifying predictors of in-hospital mortality in SI-ALI subset in vasopressor-dependent shock within two days of hospitalization [N=231; Deaths=123 (53%)]**

| Variable                                                                      | Odds Ratio | 95% Confidence Interval | p-value |
|-------------------------------------------------------------------------------|------------|-------------------------|---------|
| <b>Age Categories [years; Ref: 18-40]</b>                                     |            |                         |         |
| 41-50                                                                         | 1.37       | 0.49-3.86               | 0.550   |
| 51-60                                                                         | 2.27       | 0.86-5.98               | 0.097   |
| 61-70                                                                         | 4.60       | 1.65-12.83              | 0.004   |
| >70                                                                           | 3.14       | 1.11-8.87               | 0.031   |
| <b>Sex [Ref: Female]</b>                                                      | 0.80       | 0.41-1.55               | 0.511   |
| <b>Patient Region [Ref: West]</b>                                             |            |                         |         |
| Midwest                                                                       | 0.43       | 0.15-1.25               | 0.121   |
| Northeast                                                                     | 1.32       | 0.38-4.66               | 0.665   |
| South                                                                         | 0.52       | 0.19-1.45               | 0.212   |
| <b>3M™ APR DRG Admission Risk-of-Mortality Assignment [Ref: Extreme]</b>      |            |                         |         |
| Minor or Moderate                                                             | 0.11       | 0.03-0.39               | <0.001  |
| Major                                                                         | 0.27       | 0.13-0.56               | <0.001  |
| <b>Charlson Comorbidity Index [Ref: 0]</b>                                    |            |                         |         |
| 1-2                                                                           | 1.05       | 0.51-2.15               | 0.890   |
| >2                                                                            | 0.48       | 0.17-1.39               | 0.177   |
| <b>TBSA category [Ref: 0 %]</b>                                               |            |                         |         |
| 1-19%                                                                         | 0.84       | 0.31-2.25               | 0.723   |
| ≥20%                                                                          | 3.18       | 1.31-7.71               | 0.010   |
| <b>Initial<sup>a</sup> Empiric Systemic Antibacterial Therapy [Ref: None]</b> | 0.81       | 0.42-1.54               | 0.515   |
| <b>Hospital Bed Capacity [Ref: ≥500 beds]</b>                                 |            |                         |         |
| <500 beds                                                                     | 2.66       | 1.03-6.88               | 0.044   |
| <b>Burn Center Status [Ref: ABA Burn Center]</b>                              |            |                         |         |
| Self-reported Burn Center                                                     | 0.62       | 0.30-1.29               | 0.198   |
| Non Burn Center                                                               | 0.51       | 0.14-1.83               | 0.301   |

<sup>a</sup> Within 2 days of hospitalization Data Source: University HealthSystem Consortium (Chicago, IL)  
 ABA= American Burn Association; APR DRG= All Patients Refined Diagnosis-Related-Groups; TBSA= Total Burn Surface Area

**e-Table 5. Multivariate logistic regression identifying predictors of in-hospital mortality in SI-ALI subset without vasopressor-dependent shock within two days of hospitalization [N=538; Deaths=76 (14.1%)]**

|    | <b>Variable</b>                                                             | <b>Odds Ratio</b> | <b>95% Confidence Interval</b> | <b>P value</b> |
|----|-----------------------------------------------------------------------------|-------------------|--------------------------------|----------------|
| 1. | <b>Age [Ref: 18-40 years]</b>                                               |                   |                                |                |
|    | 40-50                                                                       | 1.13              | 0.42-3.07                      | 0.807          |
|    | 50-60                                                                       | 0.87              | 0.28-2.72                      | 0.806          |
|    | 60-70                                                                       | 5.64              | 2.04-15.62                     | 0.001          |
|    | >70                                                                         | 12.09             | 4.25-34.39                     | <0.001         |
| 2. | <b>3M™ APR DRG Admission Risk-of-Mortality Assignment [Ref: Extreme]</b>    |                   |                                |                |
|    | Minor & Moderate                                                            | 0.20              | 0.07-0.61                      | 0.004          |
|    | Major                                                                       | 0.29              | 0.15-0.58                      | <0.001         |
| 3. | <b>TBSA category [Ref: 20+%]</b>                                            |                   |                                |                |
|    | 0%                                                                          | 2.05              | 0.62-6.82                      | 0.240          |
|    | 1-19%                                                                       | 34.03             | 10.21-113.47                   | <0.001         |
| 4. | <b>Charlson Comorbidity Index [Ref: 0]</b>                                  |                   |                                |                |
|    | 1-2                                                                         | 0.80              | 0.37-1.71                      | 0.557          |
|    | >2                                                                          | 1.19              | 0.42-3.36                      | 0.738          |
| 5. | <b>Burn Center [Ref: ABA Burn Center]</b>                                   |                   |                                |                |
|    | Non Burn Center                                                             | 1.40              | 0.40-4.93                      | 0.596          |
|    | Non-ABA Burn Center                                                         | 1.35              | 0.64-2.88                      | 0.433          |
| 6. | <b>Region [Ref: West]</b>                                                   |                   |                                |                |
|    | Midwest                                                                     | 0.94              | 0.37-2.37                      | 0.887          |
|    | Northeast                                                                   | 1.25              | 0.40-3.94                      | 0.704          |
|    | South                                                                       | 2.12              | 0.77-5.81                      | 0.146          |
| 7. | <b>Sex [Ref: Female]</b>                                                    | 0.91              | 0.46-1.78                      | 0.777          |
| 8. | <b>Initial<sup>a</sup> Empiric Systemic Antibacterial Therapy [Ref: No]</b> | 1.05              | 0.50-2.20                      | 0.901          |
| 9. | <b>Hospital Bed Capacity [Ref: Extra Large ≥500 beds]</b>                   |                   |                                |                |
|    | Medium & Large                                                              | 2.42              | 0.96-6.09                      | 0.061          |

<sup>a</sup> Within 2 days of hospitalization; Data Source: University HealthSystem Consortium (Chicago, IL) ABA= American Burn Association; APR DRG= All Patients Refined Diagnosis-Related-Groups; TBSA= Total Burn Surface Area

**e-Table 6. Multivariate logistic regression identifying predictors of in-hospital mortality in SI-ALI subset with at least 96 consecutive hours of mechanical ventilation [N=426; Deaths=89(20.9%)]**

| Variable                                                                      | Odds Ratio | 95% Confidence Interval | p-value |
|-------------------------------------------------------------------------------|------------|-------------------------|---------|
| <b>Age [years; Ref: 18-40]</b>                                                |            |                         |         |
| 41-50                                                                         | 1.12       | 0.45-2.79               | 0.805   |
| 51-60                                                                         | 1.62       | 0.69-3.77               | 0.267   |
| 61-70                                                                         | 5.83       | 2.35-14.44              | <0.001  |
| >70                                                                           | 3.78       | 1.36-10.50              | 0.011   |
| <b>Sex [Ref: Female]</b>                                                      |            |                         |         |
|                                                                               | 0.71       | 0.40-1.28               | 0.255   |
| <b>Patient Region [Ref: West]</b>                                             |            |                         |         |
| Midwest                                                                       | 1.26       | 0.51-3.12               | 0.621   |
| Northeast                                                                     | 1.85       | 0.66-5.24               | 0.245   |
| South                                                                         | 1.41       | 0.57-3.49               | 0.455   |
| <b>3M™ APR DRG Admission Risk-of-Mortality Assignment [Ref: Extreme]</b>      |            |                         |         |
| Minor or Moderate                                                             | 0.30       | 0.10-0.87               | 0.027   |
| Major                                                                         | 0.62       | 0.34-1.12               | 0.113   |
| <b>Charlson Comorbidity Index [Ref: 0]</b>                                    |            |                         |         |
| 1-2                                                                           | 1.19       | 0.63-2.27               | 0.589   |
| >2                                                                            | 1.16       | 0.47-2.86               | 0.755   |
| <b>TBSA category [Ref: 0 %]</b>                                               |            |                         |         |
| 1-19%                                                                         | 1.00       | 0.37-2.72               | 0.995   |
| ≥20%                                                                          | 6.45       | 2.51-16.59              | <0.001  |
| <b>Initial<sup>a</sup> Vasopressor Use [Ref: None]</b>                        |            |                         |         |
|                                                                               | 3.66       | 2.01-6.68               | <0.001  |
| <b>Initial<sup>a</sup> Empiric Systemic Antibacterial Therapy [Ref: None]</b> |            |                         |         |
|                                                                               | 1.13       | 0.62-2.05               | 0.696   |
| <b>Hospital Bed Capacity [Ref: ≥500 beds]</b>                                 |            |                         |         |
| <500 beds                                                                     | 1.56       | 0.67-3.62               | 0.302   |
| <b>Burn Center [Ref: ABA Burn Center]</b>                                     |            |                         |         |
| Non Burn Center                                                               | 1.14       | 0.30-4.24               | 0.851   |
| Self-reported Burn Center                                                     | 1.25       | 0.65-2.40               | 0.504   |

<sup>a</sup> Within 2 days of hospitalization; Data Source: University HealthSystem Consortium (Chicago, IL)  
 ABA= American Burn Association; APR DRG= All Patients Refined Diagnosis-Related-Groups; TBSA= Total Burn Surface Area

**e-Table 7. Baseline Characteristics of the SI-ALI patients transferred in from other facilities**

| <b>Variable</b>                                                        | <b>All SI-ALI<br/>N=542 (%)</b> |
|------------------------------------------------------------------------|---------------------------------|
| <b>Age</b>                                                             |                                 |
| 18-40                                                                  | 131 (24.2)                      |
| 41-50                                                                  | 91 (16.8)                       |
| 51-60                                                                  | 132 (24.4)                      |
| 61-70                                                                  | 104 (19.2)                      |
| >70                                                                    | 84 (15.5)                       |
| <b>Sex</b>                                                             |                                 |
| Male                                                                   | 333 (61.4)                      |
| Female                                                                 | 209 (38.6)                      |
| <b>Patient region</b>                                                  |                                 |
| Midwest                                                                | 162 (29.9)                      |
| Northeast                                                              | 109 (20.1)                      |
| South                                                                  | 148 (27.3)                      |
| West                                                                   | 123 (22.7)                      |
| <b>3M<sup>TM</sup> APR DRG admission risk-of- mortality assignment</b> |                                 |
| Minor                                                                  | 51 (9.4)                        |
| Moderate                                                               | 109 (20.1)                      |
| Major                                                                  | 199 (36.7)                      |
| Extreme                                                                | 183 (33.8)                      |
| <b>Charlson Comorbidity Index</b>                                      |                                 |
| 0                                                                      | 266 (49.1)                      |
| 1-2                                                                    | 206 (38.0)                      |
| >2                                                                     | 70 (12.9)                       |
| <b>TBSA Category</b>                                                   |                                 |
| 0%                                                                     | 116 (21.4)                      |
| 1-19%                                                                  | 237 (43.7)                      |
| 20% or greater                                                         | 189 (34.9)                      |
| <b>Initial<sup>a</sup> Vasopressor Use</b>                             |                                 |
|                                                                        | 137 (25.3)                      |
| <b>Empiric Systemic Antibacterial Therapy<sup>a</sup></b>              |                                 |
|                                                                        | 166 (30.6)                      |
| <b>Hospital Bed Capacity</b>                                           |                                 |
| <500                                                                   | 137 (25.3)                      |
| ≥500                                                                   | 405 (74.7)                      |
| <b>Burn Center Status</b>                                              |                                 |
| ABA-verified Burn Center                                               | 117 (21.6)                      |
| Self-reported Burn Center                                              | 403 (74.4)                      |
| Non Burn Center                                                        | 22 (4.0)                        |

<sup>a</sup> Within 2 days of hospital admission

SI-ALI= Smoke Inhalation Associated Acute Lung Injury; APR DRG= All Patients Refined Diagnoses Related Groups; TBSA= Total Burn Surface Area



**e-Table 8. Secondary Analysis: Multivariate logistic regression identifying predictors of in-hospital mortality in excluded SI-ALI subset of patients transferred in from other facilities [N=542; Deaths=130(24%)]**

| Variable                                                                      | Odds Ratio | 95% Confidence Interval | p-value |
|-------------------------------------------------------------------------------|------------|-------------------------|---------|
| <b>Age [years; Ref: 18-40]</b>                                                |            |                         |         |
| 41-50                                                                         | 1.58       | 0.65-3.83               | 0.309   |
| 51-60                                                                         | 2.65       | 1.19-5.91               | 0.017   |
| 61-70                                                                         | 4.07       | 1.73-9.59               | 0.001   |
| >70                                                                           | 8.93       | 3.61-22.04              | <0.001  |
| <b>Sex [Ref: Female]</b>                                                      | 0.76       | 0.46-1.27               | 0.296   |
| <b>Patient Region [Ref: West]</b>                                             |            |                         |         |
| Midwest                                                                       | 0.56       | 0.27-1.17               | 0.123   |
| Northeast                                                                     | 0.70       | 0.29-1.67               | 0.424   |
| South                                                                         | 0.48       | 0.20-1.15               | 0.100   |
| <b>3M™ APR DRG Admission Risk-of-Mortality Assignment [Ref: Extreme]</b>      |            |                         |         |
| Minor or Moderate                                                             | 0.11       | 0.05-0.26               | <0.001  |
| Major                                                                         | 0.23       | 0.13-0.40               | <0.001  |
| <b>Charlson Comorbidity Index [Ref: 0]</b>                                    |            |                         |         |
| 1-2                                                                           | 1.14       | 0.63-2.06               | 0.671   |
| >2                                                                            | 0.95       | 0.43-2.07               | 0.892   |
| <b>TBSA Category [Ref: 0 %]</b>                                               |            |                         |         |
| 1-19%                                                                         | 0.60       | 0.29-1.25               | 0.170   |
| ≥20%                                                                          | 1.78       | 0.84-3.74               | 0.132   |
| <b>Initial<sup>a</sup> Vasopressor Use [Ref: None]</b>                        | 3.76       | 2.18-6.46               | <0.001  |
| <b>Initial<sup>a</sup> Empiric Systemic Antibacterial Therapy [Ref: None]</b> | 0.61       | 0.35-1.08               | 0.091   |
| <b>Hospital Bed Capacity [Ref: ≥500 beds]</b>                                 |            |                         |         |
| <500 beds                                                                     | 1.36       | 0.68-2.70               | 0.381   |
| <b>Burn Center [Ref: ABA Burn Center]</b>                                     |            |                         |         |
| Self-reported Burn Center                                                     | 0.87       | 0.45-1.71               | 0.694   |
| Non Burn Center                                                               | 0.50       | 0.15-1.70               | 0.266   |

<sup>a</sup> Within 2 days of hospitalization; Data Source: University HealthSystem Consortium (Chicago, IL)  
 ABA= American Burn Association; APR DRG= All Patients Refined Diagnosis-Related-Groups; TBSA= Total Burn Surface Area

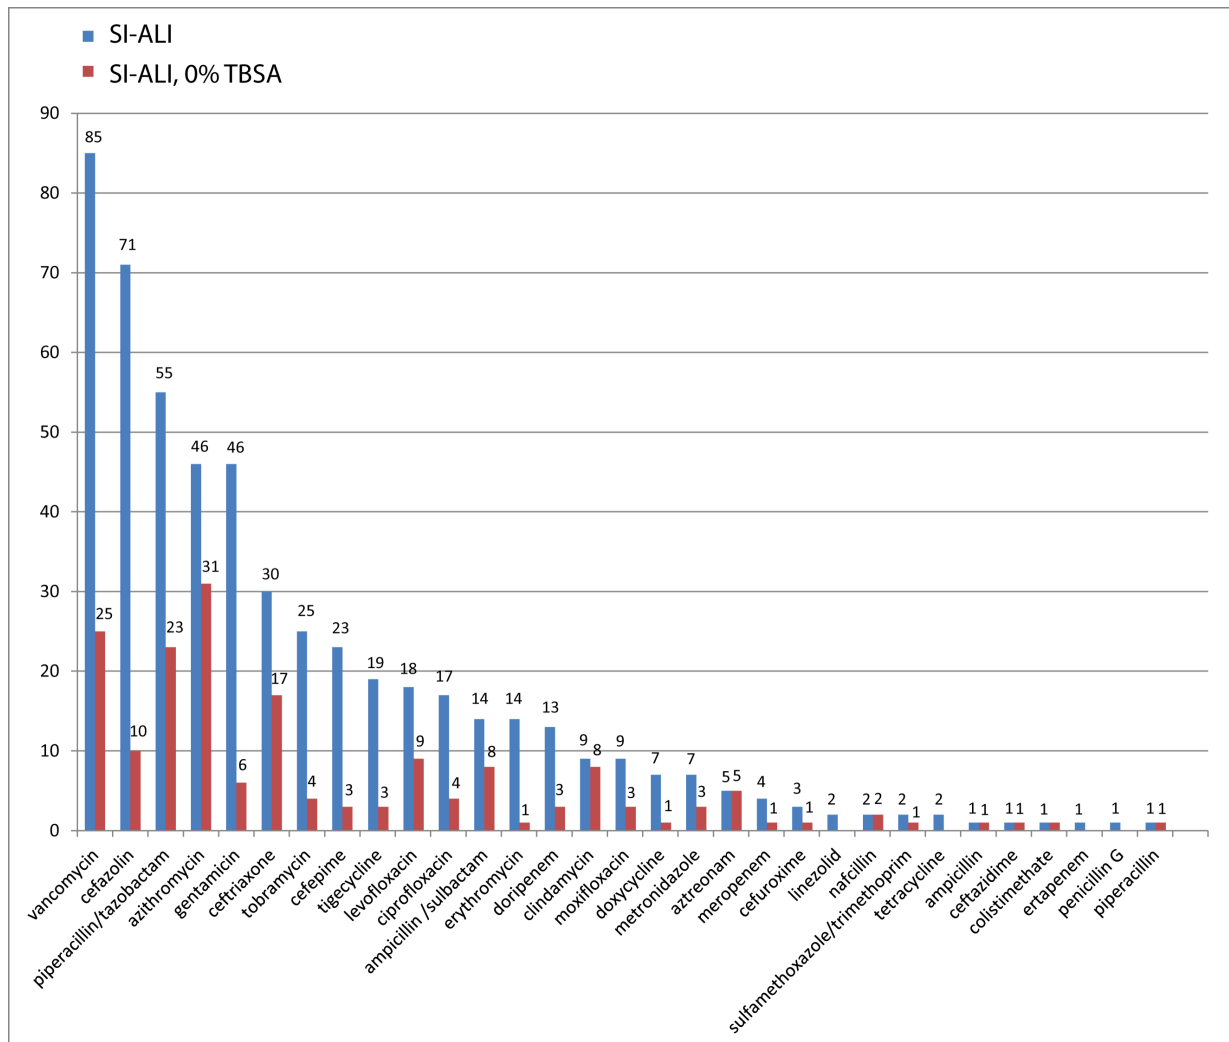

**e-Figure 1. Distribution of administration of 31 systemic antibacterial agents administered within two days of hospitalization among all SI-ALI patients and those without surface burns (N= 554 administrations among 241 SI-ALI patients)**

The number above each bar represents number of administrations for that agent among 241 SI-ALI patients.

The X-axis depicts individual antibacterial agents by name and the Y-axis depicts the absolute count for systemic antibacterial agent administrations

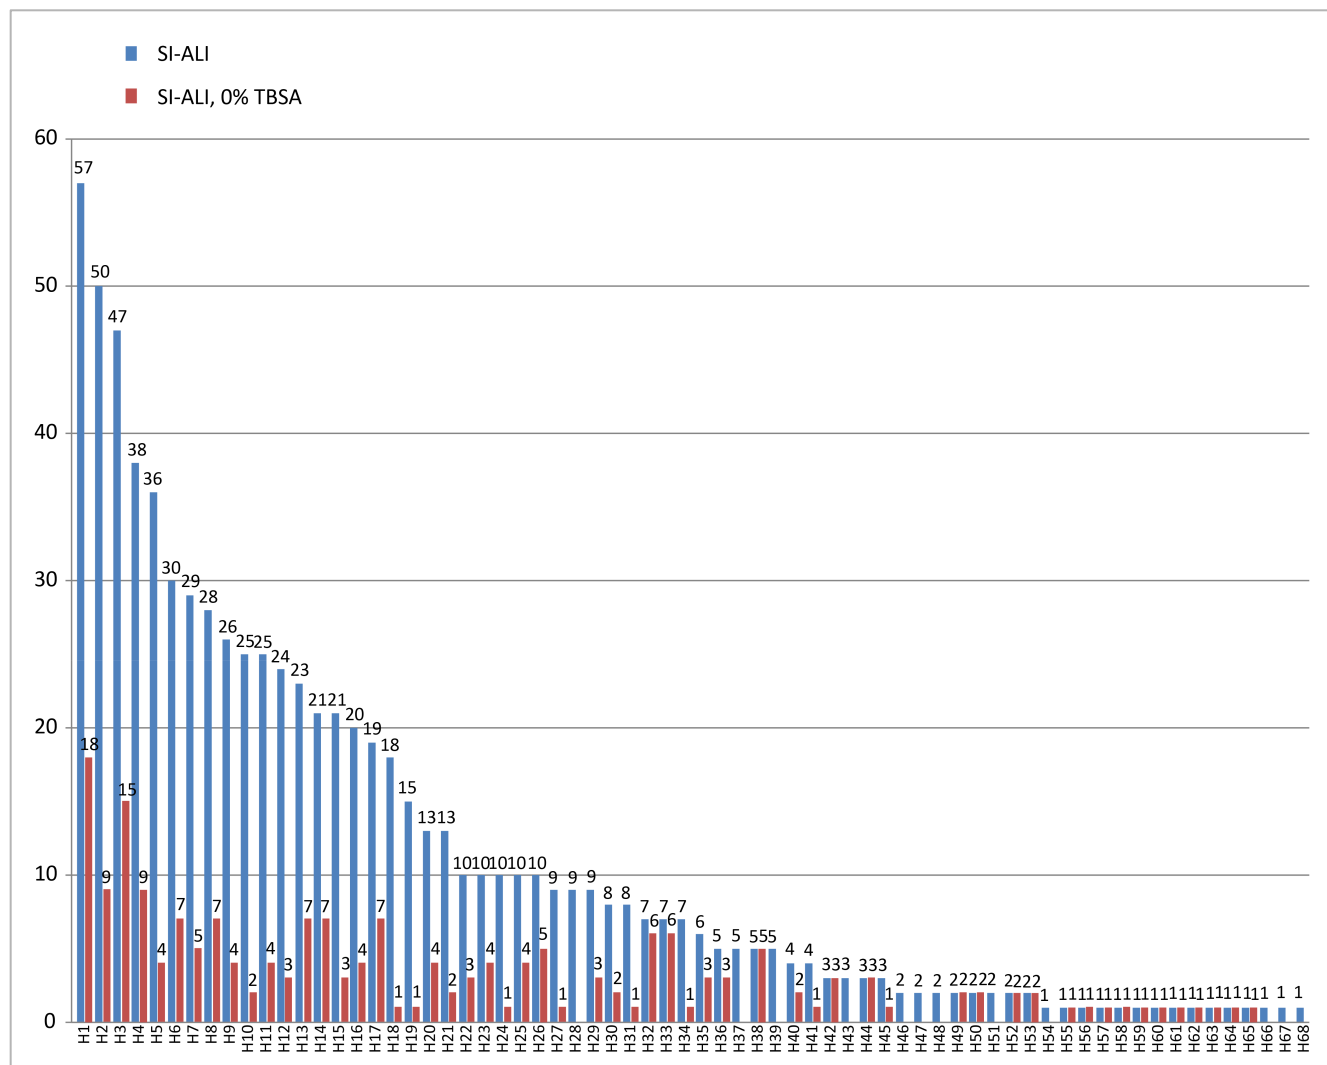

**e-Figure 2. Distribution of systemic antibacterial agent administrations within two days of hospitalization across 68 hospitals among all SIALI patients as well as those with isolated inhalation injury.**

The X-axis depicts individual hospitals numbered H1 to H68 and the Y-axis depicts the absolute count for systemic antibacterial agent administrations per center

| Smoke Exposure                                                                                                                                                                             | Likely SI-ALI                                                                                                                                                                                                                                                                                                                                     | Confirmed SI-ALI                                                    |
|--------------------------------------------------------------------------------------------------------------------------------------------------------------------------------------------|---------------------------------------------------------------------------------------------------------------------------------------------------------------------------------------------------------------------------------------------------------------------------------------------------------------------------------------------------|---------------------------------------------------------------------|
| <b>Closed space exposure to hot gases, steam or products of combustion, OR burns sustained in a closed space, OR unconscious at burns scene, OR prolonged extrication from burns scene</b> |                                                                                                                                                                                                                                                                                                                                                   |                                                                     |
| <b>OR</b><br><b>Carbonaceous deposits in oropharynx or sputum, OR facial burn</b>                                                                                                          | Intubated within 4 days of admission but for $\leq 3$ consecutive days                                                                                                                                                                                                                                                                            | Intubated within 4 days of admission but for $> 3$ consecutive days |
| <b>No evidence of lower respiratory tract Involvement</b>                                                                                                                                  | At least 1 within 4 days of injury:<br>Death/Hospice<br>OR Carboxyhemoglobin $> 10\%$<br>OR Cyanide $> 0.5\text{mg/L}$<br>OR Carbonaceous endobronchial debris/ mucosal ulcerations on bronchoscopy<br>OR Tracheobronchial cytology or biopsy evidence<br>OR Bronchial wall thickening on CT<br>OR Evidence of Infiltrates on serial chest x-rays |                                                                     |
| $\text{PaO}_2/\text{FiO}_2 < 300$ (worse within 72 hours) or<br>$\text{SaO}_2/\text{FiO}_2 < 142$                                                                                          |                                                                                                                                                                                                                                                                                                                                                   |                                                                     |

**e-Figure 3. Smoke Inhalation-Associated Acute Lung Injury (SI-ALI) clinical definition:** The proposed definition provides 3 strata based on likelihood of SI-ALI, It is based on expert opinion with the objective of introducing uniformity in diagnostic criteria among providers and investigators to facilitate benchmarking, prognostication and assessments of novel therapies.
